# Supplementary material for: Detecting subtle transcriptomic perturbations induced by lncRNAs knock-down in single-cell CRISPRi screening using a new sparse supervised autoencoder neural network
Source: Front Bioinform. 2024 Mar 4;4:1340339. doi: 10.3389/fbinf.2024.1340339 (PMC10945021; doi:10.3389/fbinf.2024.1340339)
Supplement: Supplementary file 2 [file Table1.XLSX]

## Sheet: Table S1
Supplemental Table S1: sequences of the validated sgRNAs used for the CROP-Seq experiment. Blue: 5´prefix backbone, without hU6 promoter; black: guide; green: 3'postfix backbone.
Targeted gene	Sequence
HIF1A-sg1	TGGAAAGGACGAAACACCGGCTGGCCGAAGCGACGAAGAGTTTTAGAGCTAGAAATAGCAAGTTAAAATAAGGC
HIF1A-sg2	TGGAAAGGACGAAACACCGGCCTCCTGTCCCCTCAGACGGTTTTAGAGCTAGAAATAGCAAGTTAAAATAAGGC
HIF2-sg5	TGGAAAGGACGAAACACCGTCGCGAGTGTAAAGCTCCCGGTTTTAGAGCTAGAAATAGCAAGTTAAAATAAGGC
LINC00152/ CYTOR-sg3	TGGAAAGGACGAAACACCGTGATGTACACACGACTAAGAGTTTTAGAGCTAGAAATAGCAAGTTAAAATAAGGC
LUCAT1-sg3	TGGAAAGGACGAAACACCGAAGCTCGGATTGCCTTAGACGTTTTAGAGCTAGAAATAGCAAGTTAAAATAAGGC
LUCAT1-sg5	TGGAAAGGACGAAACACCGGACTTGCCACCCTGGTTGATGTTTTAGAGCTAGAAATAGCAAGTTAAAATAAGGC
MALAT1-sg1	TGGAAAGGACGAAACACCGACTTCTCAACCGTCCCTGCAGTTTTAGAGCTAGAAATAGCAAGTTAAAATAAGGC
NEAT1-sg2	TGGAAAGGACGAAACACCGAGAGAAGCGGGGATACACTGGTTTTAGAGCTAGAAATAGCAAGTTAAAATAAGGC
NEAT1-sg6	TGGAAAGGACGAAACACCGTCCCTGTCGCTAACTCCGGCGTTTTAGAGCTAGAAATAGCAAGTTAAAATAAGGC
SNHG12-sg1	TGGAAAGGACGAAACACCGCGCAGTCCGAAGCGAGAGAAGTTTTAGAGCTAGAAATAGCAAGTTAAAATAAGGC
SNHG12-sg3	TGGAAAGGACGAAACACCGGCAGCTAGTAAGTCGACACCGTTTTAGAGCTAGAAATAGCAAGTTAAAATAAGGC
SNHG21-sg5	TGGAAAGGACGAAACACCGAGGGGTCGTTGCATCTGTCGGTTTTAGAGCTAGAAATAGCAAGTTAAAATAAGGC
Neg sg1	TGGAAAGGACGAAACACCGCGCCAAACGTGCCCTGACGGGTTTTAGAGCTAGAAATAGCAAGTTAAAATAAGGC
Neg sg2	TGGAAAGGACGAAACACCGTGCGATGGGGGGGTGGGTAGCGTTTTAGAGCTAGAAATAGCAAGTTAAAATAAGGC

## Sheet: Table S2
Supplemental Table S2: qPCR Primers used for sgRNA validation
Primer Name	Primer Sequence	Citation/Source
LUCAT1-F	TCAAGCTCGGATTGCCTTAG	PMID: 33686243
LUCAT1-R	AGGAAAGGAGCCAGAAGTCAG
NEAT1-F	ACAGTGGCAGGGTTCAATTC
NEAT1-R	TCAGATGGGGAAATGGAGAG
MALAT1-F	GAATTGCGTCATTTAAAGCCTAGTT	PMID: 29100395
MALAT1-R	GTTTCATCCTACCACTCCCAATTAAT
Linc00152-F	AGAATGAAGGCTGAGGTGTG
Linc00152-R	CAGCGACCATCCAGTCATTTA
snHG12_F	ACAATCTCTATGGGAAGCAGAAG
snHG12_R	AGTTCAGTAGCACACTGCATAA
SNHG21_R	CCTGAAAGCACAAAGCAGTTATT
SNHG21_F	GACTTGTGTCTGCTCCACTT
HIF1A-F	TGGTTCTCACAGATGATGGTG
HIF1A-R	TCATGGTCACATGGATGAGTAAA
HIF2A/EPAS1-F	GGCTGTGTCTGAGAAGAGTAAC
HIF2A/EPAS1-R	CCCGAAATCCAGAGAGATGATG
RPLP0-F	GCATCAGTACCCCATTCTATCAT
RPLP0-R	AGGTGTAATCCGTCTCCACAGA

## Sheet: Table S3
Supplemental Table S3: Number of cells in each experimental condition
	Normoxia	Hypoxia-3H	Hypoxia-6H	Hypoxia-24h
Doublet	268	409	216	336
HIF1A-sg1	216	238	159	215
HIF1A-sg2	267	340	227	343
HIF2-sg5	151	209	108	214
LINC00152-sg3	151	203	158	212
LUCAT1-sg3	171	244	148	251
LUCAT1-sg5	278	365	258	420
MALAT1-sg1	207	276	201	248
NEAT1-sg2	167	221	135	223
NEAT1-sg6	112	177	110	164
SNHG12-sg1	134	129	107	156
SNHG12-sg3	67	93	49	68
SNHG21-sg5	214	268	195	307
Neg-sg1	203	241	188	272
Neg-sg2	231	280	210	306
Negative	362	435	330	415
Total nb of cells	3199	4128	2799	4150
